# Supplementary material for: Chemokine-cleaving Streptococcus pyogenes protease SpyCEP is necessary and sufficient for bacterial dissemination within soft tissues and the respiratory tract
Source: PubMed Central journal article supplement (PMC2904501; doi:10.1111/j.1365-2958.2010.07065.x), 2010-02-10
Supplement: mmi0076-1387-SD1.pdf [file mmi0076-1387-SD1.pdf]

## Supporting information

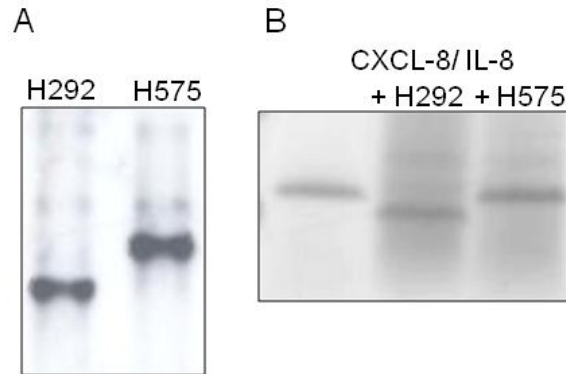

**Figure S1.** Confirmation of mutation in *S. pyogenes*. (A) Southern blot analysis of *Xmn*I-cut genomic DNA from isogenic *S. pyogenes* strains H292 (parent strain) and H575 (mutant strain) hybridized with DIG-labeled *cepA* PCR product. (B) Cleavage of IL-8 (CXCL8) by parent *S. pyogenes* strain H292 but not H575.
